# Supplementary material for: Mental health and well-being concerns of fly-in fly-out workers and their partners in Australia: a qualitative study
Source: PubMed Central journal article supplement — BMJ Open. 2018 Mar 5;8(3):e019516. doi: 10.1136/bmjopen-2017-019516 (PMC5855220; doi:10.1136/bmjopen-2017-019516), 2018-03-05
Supplement: bmjopen-2017-019516supp001.pdf [file bmjopen-2017-019516supp001.pdf]

## **Supplemental File – Open response survey**

1. Are you concerned about how the FIFO lifestyle affects you?
2. What concerns you the most about the FIFO lifestyle?
3. Are you concerned about how the FIFO lifestyle affects your partner?
4. Is there anything in particular that worries you about FIFO and your relationship?
5. Do you feel there is adequate support for those experiencing difficulties due to the FIFO lifestyle?
6. Do you think people seek the help they need?
7. What barriers do you think holds them back from seeking the support?
8. Do you have suggestions on how support for FIFO workers and FIFO partners could be made better?
